# Supplementary material
Source: PubMed Central journal article supplement (PMC4167541)
Supplement: NIHMS617206-supplement-1.pdf [file NIHMS617206-supplement-1.pdf]

*β-catenin* TALEN induced mutations

```
tcagccactGGCAGCAGCAGTCTTacttggattctggaatccattcTGGTGCCACCACCACagctccttc (wt)
tcagccactGGCAGCAGCAGTCTTacttggatt-gaaaatccattcTGGTGCCACCACCACagctccttc (Δ1)
tcagccactGGCAGCAGCAGTCTTacttg-----ttcTGGTGCCACCACCACagctccttc (Δ14)
tcagccactGGCAGCAGCAGTCTTa-----aaacattcTGGTGCCACCACCACagctccttc (Δ13)
tcagccactGGCAGCAGCAGTCTTacttgg-----cattcTGGTGCCACCACCACagctccttc (Δ10)
tcagccactGGCAGCAGCAGTCTTacttggatt-tgga---cattcTGGTGCCACCACCACagctccttc (Δ4)
tcagccactGGCAGCAGCAGTCTTacttggatt----aatccattcTGGTGCCACCACCACagctccttc (Δ4)
tcagccactGGCAGCAGCAGTCTTacttggatt-----GGTGCCACCACCACagctccttc (Δ14)
tcagccactGGCAGCAGCAGTCTTacttggattctct|taatccattcTGGTGCCACCACCACagctccttc (ins1)
tcagccactGGCAGCAGCAGTCTTacttggattctggaatc|cattcTGGTGCCACCACCACagctccttc (ins4)
```

**Supplementary Figure 1. *β-catenin* TALEN induced mutations in H2.35 cells.**

H2.35 cells were transfected with GoldyTALEN vector, left, right, or both *β-catenin* TALENs. Genomic DNA was extracted after 72 hours of transfection, PCR amplified for the TALEN target region. The amplicons were then subjected to XmnI restriction enzyme digestion, and the uncut bands were purified and subjected to TA cloning. Then clones were randomly picked and sequenced. TALEN binding sites are highlighted in yellow.
