# Supplementary material
Source: PubMed Central journal article supplement (PMC4167541)
Supplement: NIHMS617206-supplement-3.pdf [file NIHMS617206-supplement-3.pdf]

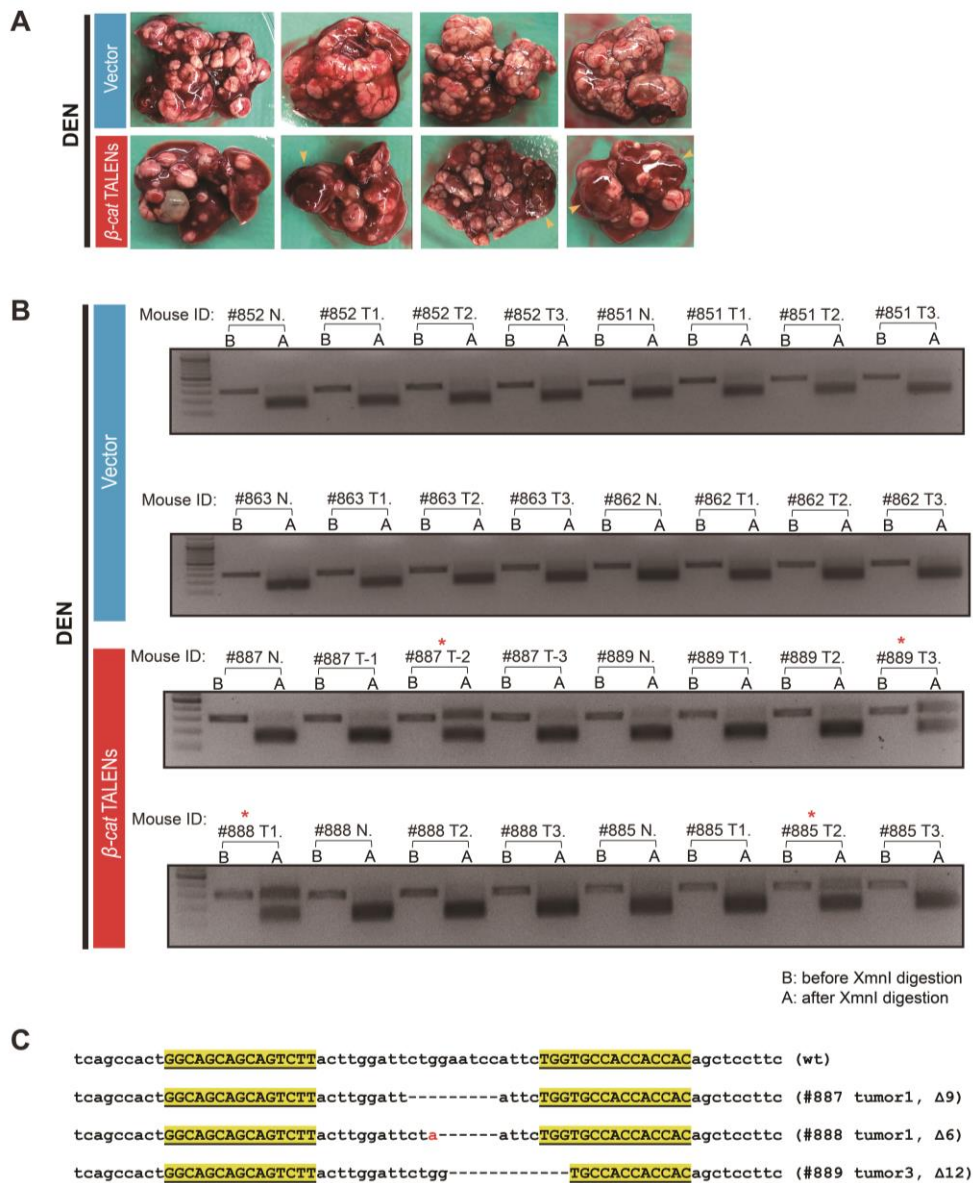

**Supplementary Figure 3. *β-catenin* TALENs plus DEN were able to induce extensive liver tumorigenesis in C3H mice.**

(A) C3H mice were treated with GoldyTALEN vector (20ug) plus DEN or *β-catenin* TALEN (10ug of each) plus DEN according to the schema in Fig. 3C. n = 4. The yellow arrows point to distinct tumors with a red, fleshy appearance.

(B) Genotyping of liver samples from the C3H mice. Adjacent normal tissue (labeled as “N”) and tumor (labeled as “T”) were taken from each liver. The red asterisks indicate TALEN induced *β-catenin* mutations.

(C) Sequencing results of the *β-catenin* mutated tumors. Highlighted in yellow are the TALEN binding sites.
