# Supplementary material
Source: PubMed Central journal article supplement (PMC4167541)
Supplement: NIHMS617206-supplement-5.pdf [file NIHMS617206-supplement-5.pdf]

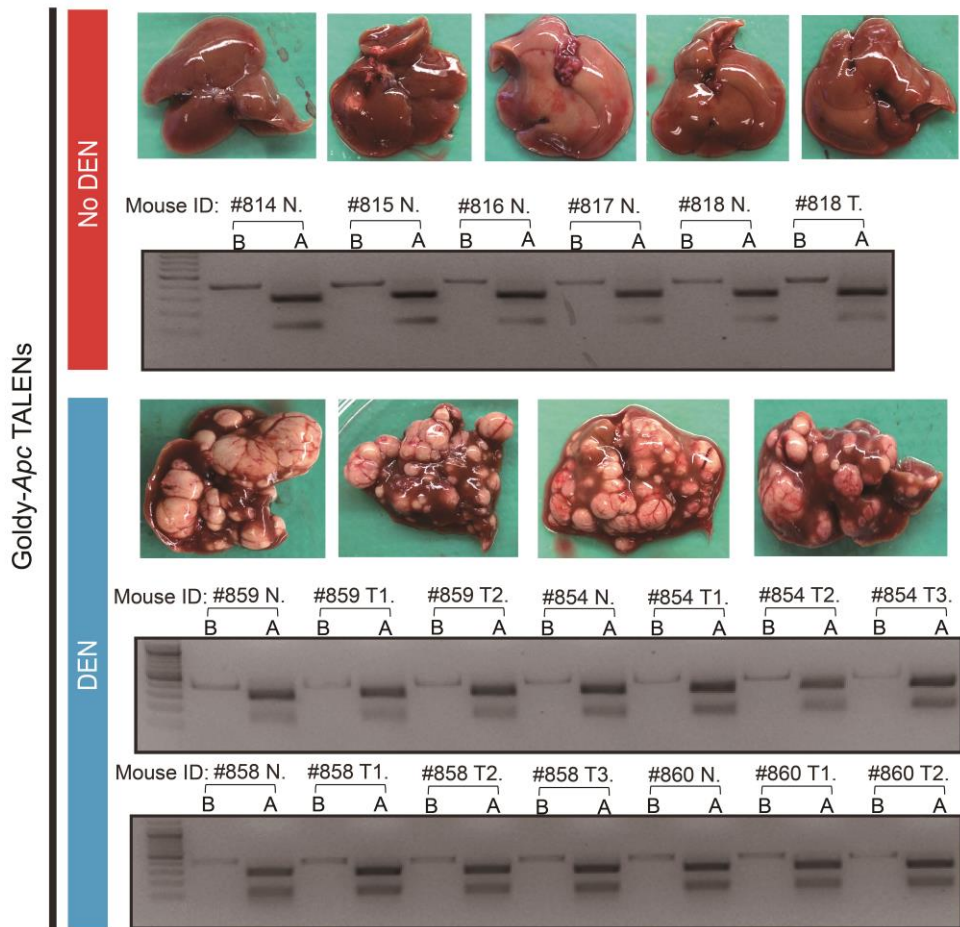

B: before PvuII digestion  
A: after PvuII digestion

**Supplementary Figure 5. *Apc* TALENs lack the ability to induce *Apc* mutated tumors, with or without DEN.**

C3H mice were treated with *Apc* TALENs (10ug of each arm) in the presence or absence of DEN (DEN group: n = 4; NO DEN group: n = 5). The liver images from *Apc* TALEN treated mice and their corresponding genotyping results are shown in the panels. "N" indicates normal tissue. "T" indicates tumor.
