# Supplementary material
Source: PubMed Central journal article supplement (PMC4167541)
Supplement: NIHMS617206-supplement-6.pdf [file NIHMS617206-supplement-6.pdf]

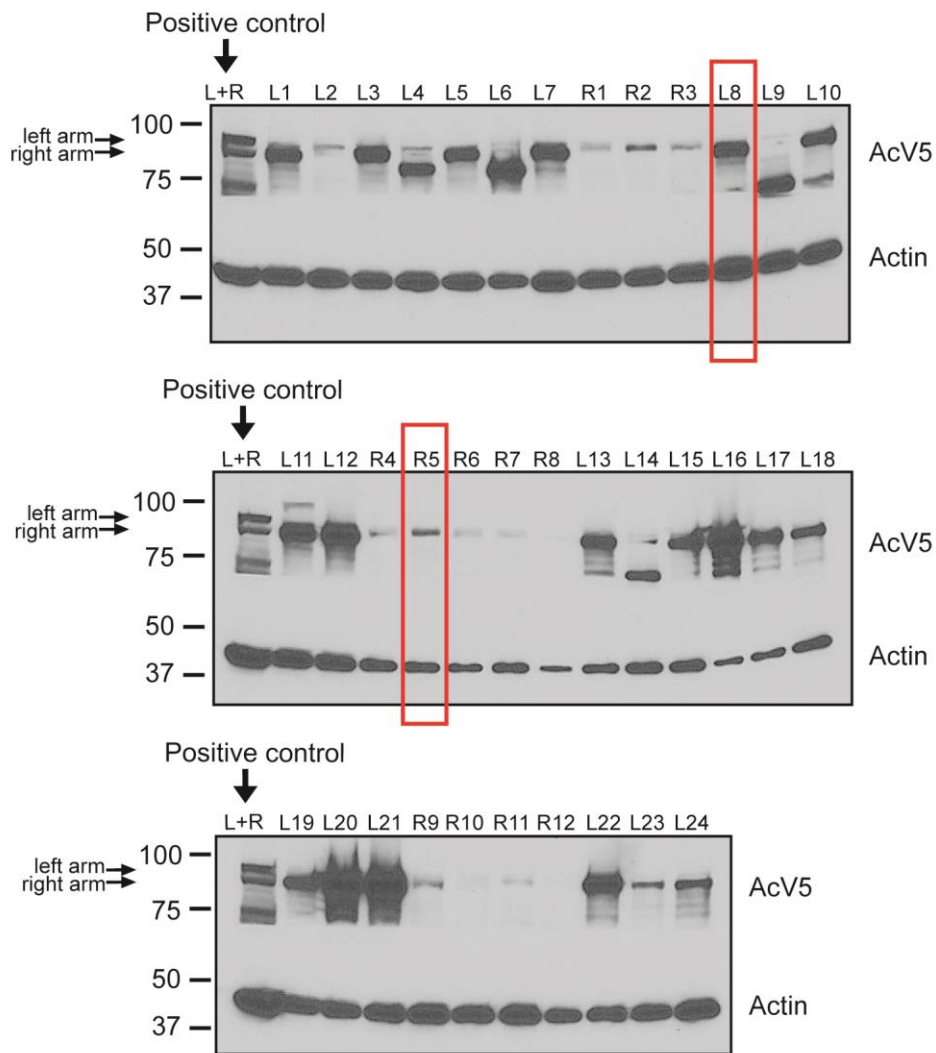

**Supplementary Figure 6. Expression screening of adenoviral plaques for Ad-Apc-TAL**

Adenoviral plaques made from 911 cells were harvested to test the TALEN protein expression. The first lane of each gel is the positive control expressing TALENs from the GoldyTALEN plasmids: upper band is left arm and lower band is right arm. L8 and R5, shown in the red boxes, were picked for further experimentation.
