# Supplementary material
Source: PubMed Central journal article supplement (PMC4167541)
Supplement: NIHMS617206-supplement-7.pdf [file NIHMS617206-supplement-7.pdf]

## Supplementary Table 1. TALEN Characteristics

| Organism     | Gene             | Exon length | Spacer length | Unique restriction sites in spacer | TALEN size and repeat variable di-residue sequence, left TALEN shown in upper row |                                                    | TALEN target sequence (plus strand)                      |
|--------------|------------------|-------------|---------------|------------------------------------|-----------------------------------------------------------------------------------|----------------------------------------------------|----------------------------------------------------------|
|              |                  |             |               |                                    |                                                                                   |                                                    |                                                          |
| Mus musculus | <i>Apc</i>       | 9           | 16            | PvuII                              | 17                                                                                | NI NN HD NG NI NG NN NG HD HD NI NN HD NG HD HD HD | T AGCTATGTCCAGCTCCC aagacagctgtatc CATGCGGCAGTCTGG A     |
|              |                  |             |               |                                    | 15                                                                                | HD HD NI NN NI HD NG NN HD HD NN HD NI NG NN       |                                                          |
| Mus musculus | <i>B-catenin</i> | 2           | 16            | XmnI                               | 15                                                                                | NN NN HD NI NN HD NI NN HD NI NN NG HD NG NG       | T GGCAGCAGCAGTCTT acttgattctggaatcattc TGGTGCCACCACCAC A |
|              |                  |             |               |                                    | 15                                                                                | NN NG NN NN NG NN NN NG NN NN HD NI HD HD NI       |                                                          |
